# Supplementary material
Source: PubMed Central journal article supplement (PMC2965201)
Supplement: NIHMS222327-supplement-01.pdf [file NIHMS222327-supplement-01.pdf]

## Supporting Information

### Photoaffinity Labeling of Ras Converting Enzyme 1 (Rce1p) using a Benzophenone-Containing Peptide Substrate

*Kelly Kyro,<sup>a</sup> Surya Manandhar,<sup>b</sup> Daniel Mullen,<sup>a</sup> Walter K. Schmidt<sup>b</sup> and Mark D. Distefano<sup>a\*</sup>*

*<sup>a</sup>Departments of Chemistry and Medicinal Chemistry, University of Minnesota, Minneapolis, MN 55455*

*<sup>b</sup>Department of Biochemistry and Molecular Biology, University Georgia, Athens, GA 30602*

\*Corresponding author. Tel.: 612-624-0544; fax: 612-626-7541.  
E-mail address: diste001@umn.edu

### Compound Characterization List:

Retention times ( $t_R$ ) are based on analytical RP-HPLC using a linear gradient from 100% H<sub>2</sub>O to 40% H<sub>2</sub>O/60% CH<sub>3</sub>CN over 60 min and a flow rate of 1.0 mL/min. Peptide concentrations were determined by UV spectroscopy:  $\epsilon_{349} = 18,000 \text{ mM}^{-1}\cdot\text{cm}^{-1}$ .

#### Abz-KSKTKCK(Dnp)IM, 1.

Reaction scale: 0.050 mmol, yield: 20.0 mg (30%), purity by RP-HPLC: 94.4%,  $t_R = 41$  min., ESI-MS (m/z):  $[\text{M}+\text{H}]^+$  calcd for C<sub>58</sub>H<sub>94</sub>N<sub>16</sub>O<sub>17</sub>S<sub>2</sub> 1351.6424, found 1351.7236;  $[\text{M}+2\text{H}]^{2+}$  calcd for C<sub>58</sub>H<sub>95</sub>N<sub>16</sub>O<sub>17</sub>S<sub>2</sub> 676.3212, found 676.3596;  $[\text{M}+3\text{H}]^{3+}$  calcd for C<sub>58</sub>H<sub>96</sub>N<sub>16</sub>O<sub>17</sub>S<sub>2</sub> 451.2141, found 451.2424.

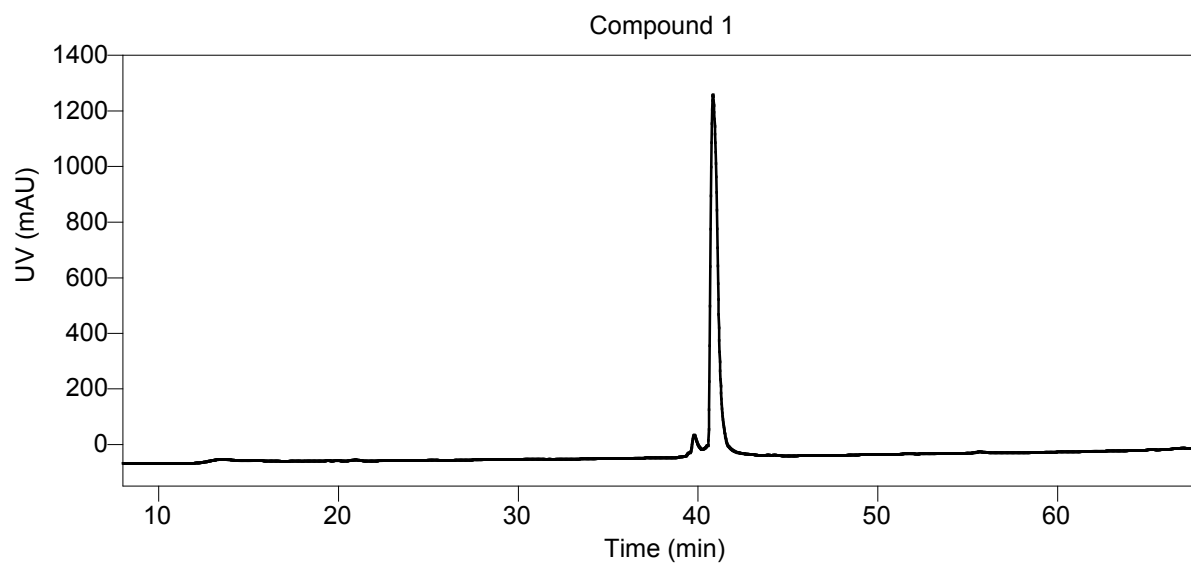

**Abz-KSKTKC(C5BP)K(Dnp)IM, 4.**

Reaction scale: 0.007 mmol, yield: 3.3 mg (27%), purity by RP-HPLC: 91.5%,  $t_R = 60$  min., ESI-MS (m/z):  $[M+2H]^{2+}$  calcd for  $C_{77}H_{113}N_{16}O_{19}S_2$  815.3866, found 815.3873;  $[M+3H]^{3+}$  calcd for  $C_{77}H_{114}N_{16}O_{19}S_2$  543.9244, found 543.9283.

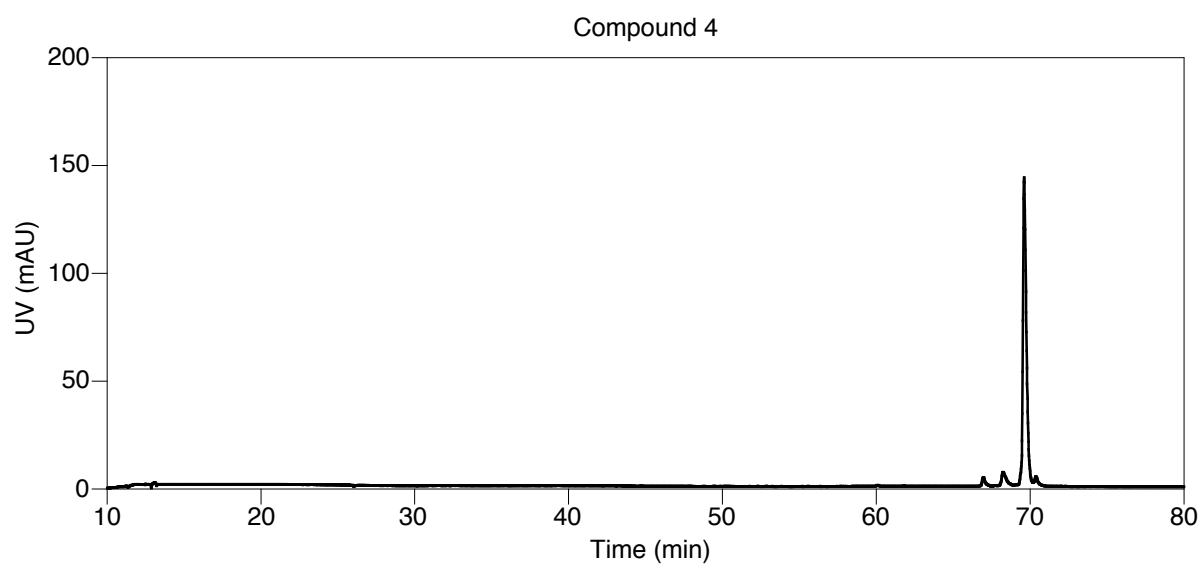

**Biotin-K(Dde)KSKTKCK(Dnp)IM, 5.**

Reaction scale: 0.040 mmol, yield: 20.0 mg (28%), purity by RP-HPLC: 75.6%,  $t_R = 52$  min., ESI-MS (m/z):  $[M+2Na]^{2+}$  calcd for  $C_{91}H_{153}N_{21}O_{26}S_3Na_2$  1049.0127, found 1048.6907;  $[M+2Na+H]^{3+}$  calcd for  $C_{91}H_{154}N_{21}O_{26}S_3Na_2$  699.6751, found 699.4679;  $[M+2Na+2H]^{4+}$  calcd for  $C_{91}H_{155}N_{21}O_{26}S_3Na_2$  525.0063, found 524.5923.

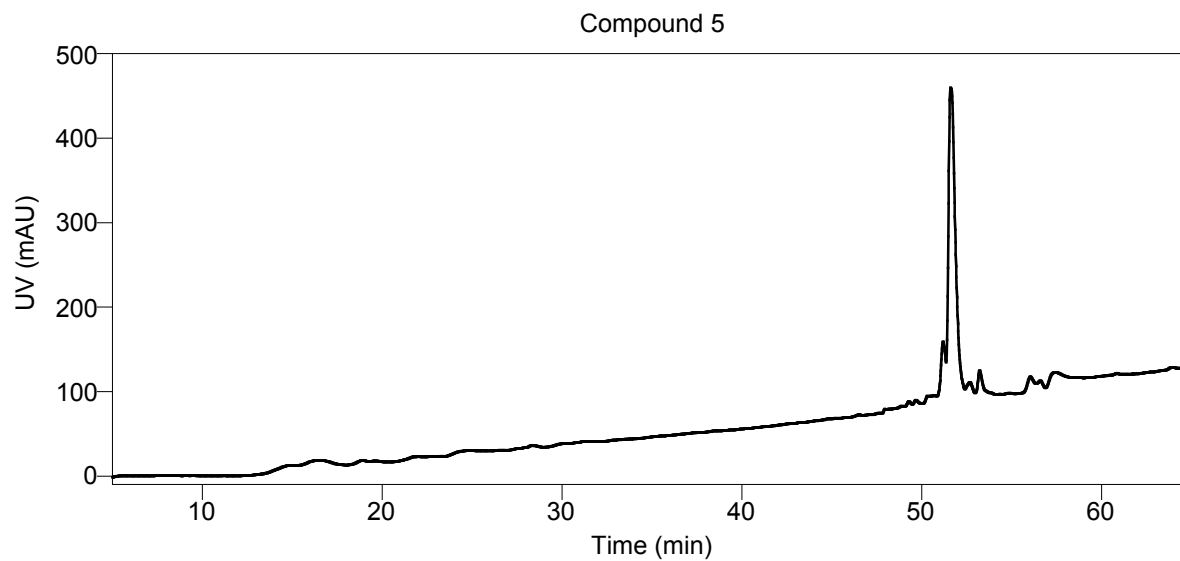

**Biotin-K(Dde)KSKTKC(C5BP)K(Dnp)IM, 6.**

Reaction scale: 0.007 mmol, yield: 12.0 mg (74%), purity by RP-HPLC: 97.0%,  $t_R = 61$  min., ESI-MS (m/z):  $[M+2Na]^{2+}$  calcd for  $C_{110}H_{171}N_{21}O_{28}S_3Na_2$  1188.0780, found 1187.8760;  $[M+2Na+H]^{3+}$  calcd for  $C_{110}H_{172}N_{21}O_{28}S_3Na_2$  792.3853, found 792.2635;  $[M+2Na+2H]^{4+}$  calcd for  $C_{110}H_{173}N_{21}O_{28}S_3Na_2$  594.5390, found 594.4493.

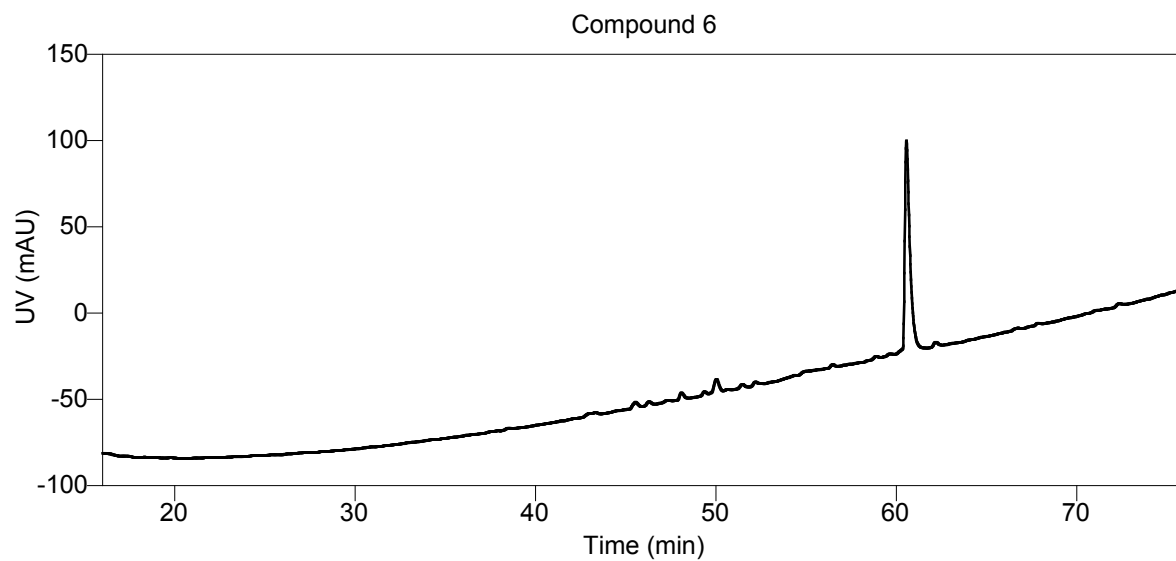

**Table 2**

Summary of ESI-MS-MS for unprocessed peptide, **2**, and cleavage product, **7** (-f, loss of farnesyl (C<sub>15</sub>H<sub>25</sub>); -g, loss of farnesyl-H<sub>2</sub>O (C<sub>15</sub>H<sub>27</sub>O); -h, loss of H<sub>2</sub>O; -i, loss of NH<sub>3</sub>).

| Peptide Ion                       | <b>2</b> |         | <b>7</b> |        |
|-----------------------------------|----------|---------|----------|--------|
|                                   | Calc.    | Obs.    | Calc.    | Obs.   |
| [M+H] <sup>+</sup> (-f)           | 1352.66  | 1352.68 | 813.44   | 813.49 |
| [M+2H] <sup>2+</sup>              |          |         | 509.31   | 509.38 |
| [M+2H] <sup>2+</sup> (-f)         | 676.83   | 676.33  | 406.72   | 407.27 |
| [M+2H] <sup>2+</sup> (-g)         | 667.83   | 667.33  |          |        |
| y <sub>9</sub> (-f)               | 1232.61  | 1232.61 |          |        |
| y <sub>8</sub> (-f)               | 1104.52  | 1104.52 |          |        |
| y <sub>7</sub> (-f)               | 1017.49  | 1017.51 |          |        |
| y <sub>6</sub> (-f)               | 889.39   | 889.42  |          |        |
| y <sub>5</sub>                    |          |         | 769.48   | 770.55 |
| y <sub>9</sub> <sup>2+</sup>      | 718.90   | 719.40  |          |        |
| y <sub>7</sub> <sup>2+</sup> (-h) | 602.33   | 601.80  |          |        |
| y <sub>5</sub> (-f)               |          |         | 566.30   | 566.34 |
| y <sub>8</sub> <sup>2+</sup> (-f) | 552.76   | 552.76  |          |        |
| y <sub>2</sub>                    | 263.14   | 263.15  |          |        |
| y <sub>1</sub>                    | 150.06   | 150.06  |          |        |
| b <sub>9</sub> (-f)               | 1202.61  | 1202.60 |          |        |
| b <sub>8</sub> <sup>2+</sup> (-f) | 545.76   | 545.26  |          |        |
| b <sub>6</sub>                    |          |         | 692.42   | 692.46 |
| b <sub>4</sub>                    | 463.27   | 463.26  | 463.27   | 463.34 |
| b <sub>3</sub>                    | 335.18   | 335.17  |          |        |
| b <sub>2</sub>                    | 248.15   | 248.14  | 248.15   | 248.19 |
| b <sub>2</sub> (-h)               | 230.15   | 230.14  | 230.15   | 230.19 |
| b <sub>1</sub>                    | 120.10   | 120.05  | 120.10   | 120.08 |
| a <sub>7</sub> (-i)               | 955.59   | 955.47  |          |        |
| a <sub>9</sub> <sup>2+</sup>      | 690.40   | 690.88  |          |        |
| a <sub>9</sub> <sup>2+</sup> (-f) | 588.31   | 587.81  |          |        |
| a <sub>3</sub> <sup>2+</sup>      | 154.60   | 155.08  | 154.60   | 155.12 |

**Table 3**

Summary of ESI-MS-MS for unprocessed peptide, **4**, and cleavage product, **8** (BP, benzophenone fragment, (3-benzoylphenyl)methyl cation ( $C_{14}H_{11}O^+$ ); -b, loss of benzophenone fragment; -c, loss of (*E*)-(3-(((2-methylbut-2-en-1-yl)oxy)methyl)phenyl)(phenyl)methanone ( $C_{19}H_{20}O_2$ ); -d, loss of benzophenone- $H_2O$ , (3-(hydroxymethyl)phenyl)(phenyl)methanone ( $C_{14}H_{13}O_2$ ); -h, loss of  $H_2O$ ).

| Peptide Ion                       | <b>4</b> |         | <b>8</b> |        |
|-----------------------------------|----------|---------|----------|--------|
|                                   | Calc.    | Obs.    | Calc.    | Obs.   |
| [M+H] <sup>+</sup> (-b)           |          |         | 897.49   | 897.52 |
| [M+2H] <sup>2+</sup> (-b)         | 718.86   | 718.51  |          |        |
| [M+2H] <sup>2+</sup> (-d)         | 709.86   | 709.51  | 440.56   | 440.33 |
| [M+2H] <sup>2+</sup>              |          |         | 546.28   | 546.36 |
| [M+3H] <sup>3+</sup>              | 544.27   | 543.96  |          |        |
| [M+3H] <sup>3+</sup> (-d)         | 473.24   | 473.26  |          |        |
| [M+2H] <sup>2+</sup> (-c)         |          |         | 406.72   | 406.29 |
| y <sub>8</sub> (-b)               | 1188.56  | 1188.71 |          |        |
| y <sub>6</sub>                    |          |         | 972.51   | 972.53 |
| y <sub>5</sub>                    |          |         | 844.42   | 844.59 |
| y <sub>4</sub>                    |          |         | 757.39   | 757.52 |
| y <sub>9</sub> <sup>2+</sup>      | 755.88   | 756.04  |          |        |
| y <sub>8</sub> <sup>2+</sup>      | 691.83   | 691.97  |          |        |
| y <sub>7</sub> <sup>2+</sup>      | 649.31   | 649.95  |          |        |
| y <sub>5</sub> (-d)               |          |         | 632.35   | 632.44 |
| y <sub>3</sub>                    |          |         | 629.29   | 629.40 |
| y <sub>6</sub> <sup>2+</sup>      | 585.26   | 585.86  |          |        |
| y <sub>2</sub>                    | 263.14   | 263.16  | 528.24   | 528.31 |
| y <sub>5</sub> <sup>2+</sup>      |          |         | 423.21   | 422.80 |
| y <sub>1</sub>                    | 150.06   | 150.09  | 400.15   | 400.23 |
| b <sub>9</sub> <sup>2+</sup>      | 741.37   | 741.05  |          |        |
| b <sub>6</sub>                    |          |         | 692.42   | 692.51 |
| b <sub>9</sub> <sup>2+</sup> (-d) | 635.33   | 634.94  |          |        |
| b <sub>5</sub>                    |          |         | 564.32   | 564.37 |
| b <sub>4</sub> (-h)               |          |         | 445.26   | 445.36 |
| b <sub>6</sub> <sup>2+</sup>      |          |         | 347.21   | 346.77 |
| b <sub>3</sub>                    | 335.18   | 335.24  | 335.18   | 335.22 |
| b <sub>3</sub> (-h)               |          |         | 317.17   | 317.23 |
| b <sub>2</sub>                    | 248.15   | 248.16  | 248.15   | 248.18 |
| b <sub>2</sub> (-h)               | 230.15   | 230.17  | 230.15   | 230.17 |
| b <sub>3</sub> <sup>2+</sup>      | 167.59   | 167.12  |          |        |
| b <sub>1</sub>                    | 120.10   | 120.05  | 120.10   | 120.07 |
| a <sub>5</sub>                    |          |         | 537.33   | 537.35 |
| BP                                | 195.12   | 195.12  | 195.12   | 195.12 |
